# Supplementary material
Source: ML conference proceedings conference paper supplement (https://openreview.net/forum?id=BlbhyDUo9xc)

# Binary Gaussian Classifier

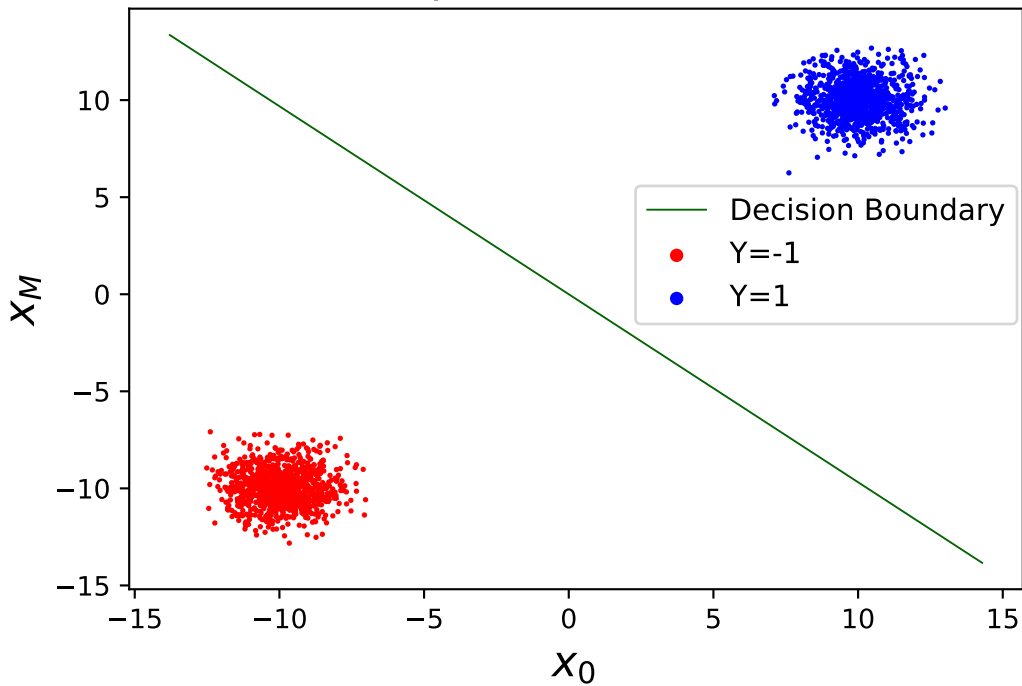

Supplement: supplementary_material [file attachment]

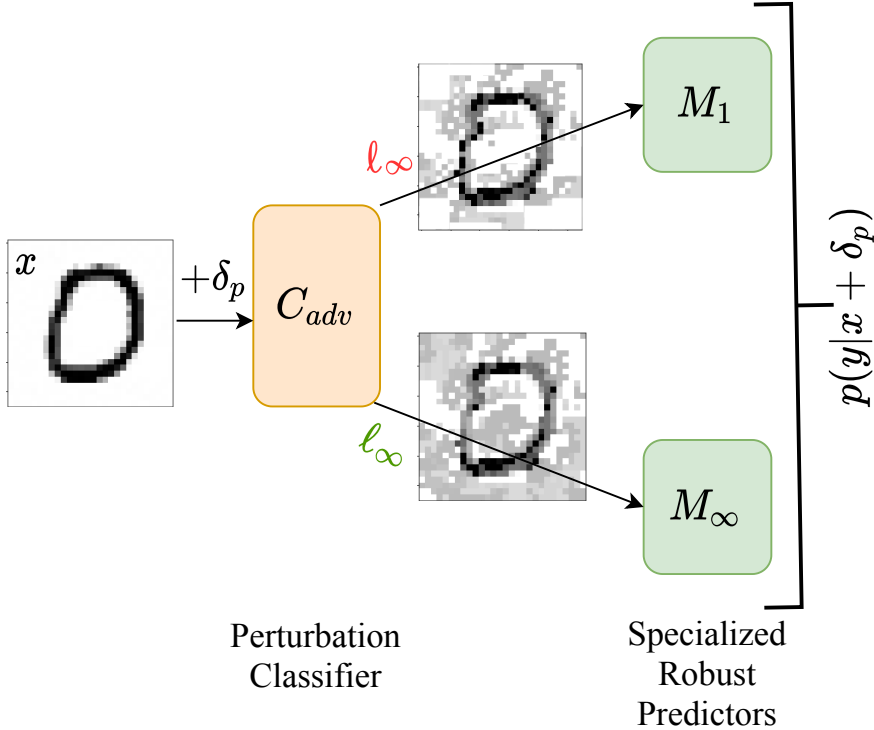

Supplement: supplementary_material [file attachment]

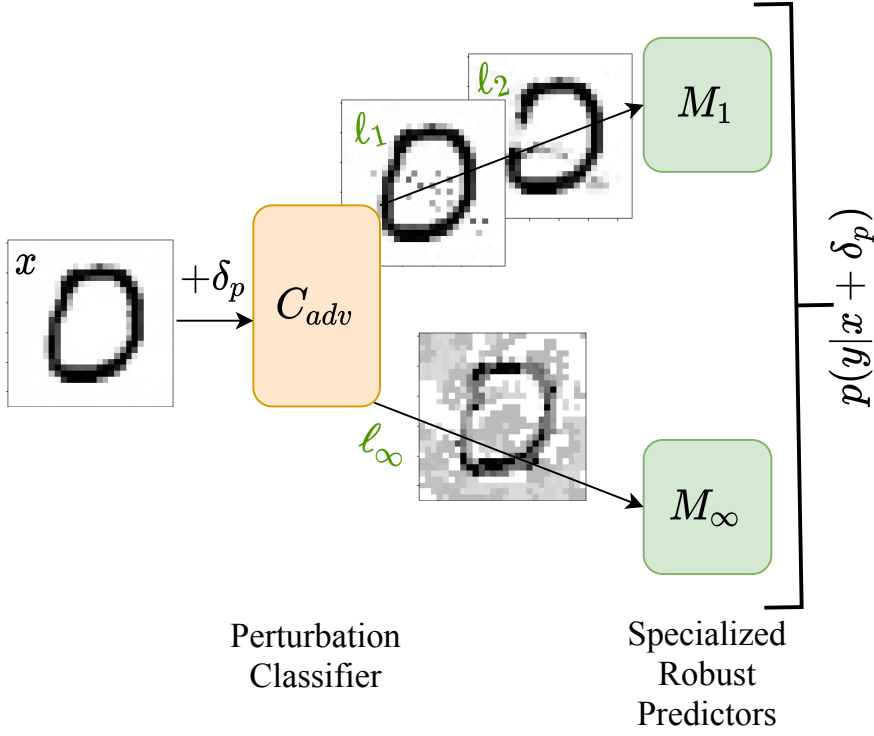

Supplement: supplementary_material [file attachment]

$\ell_1$  Robust Model

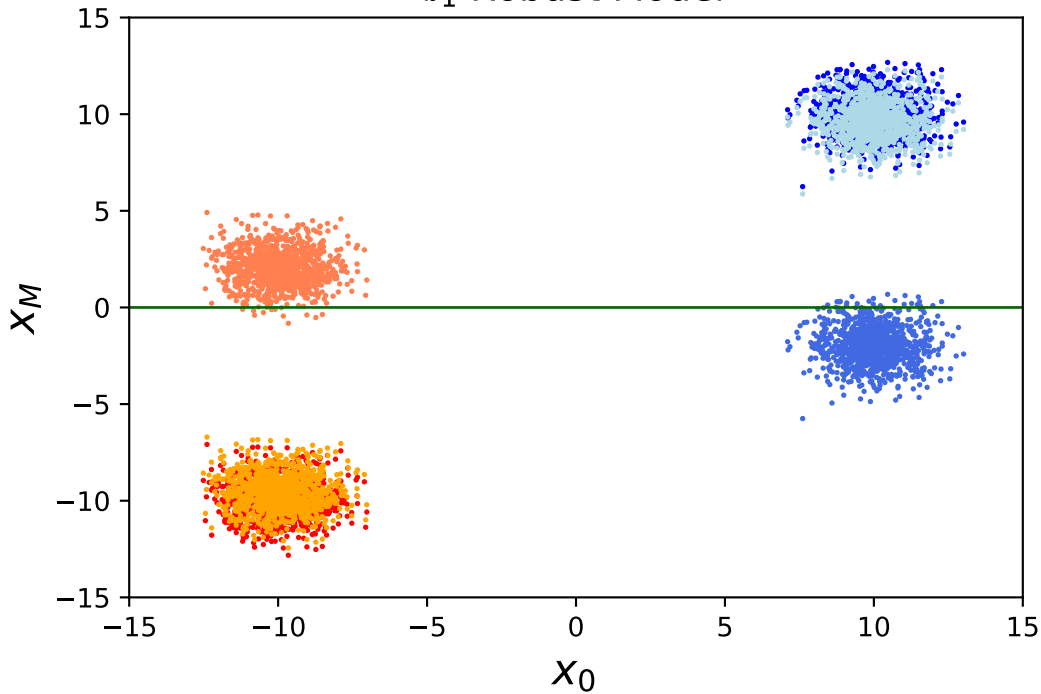

Supplement: supplementary_material [file attachment]

Adding small random noise to  $x'$  recovers the correct label prediction

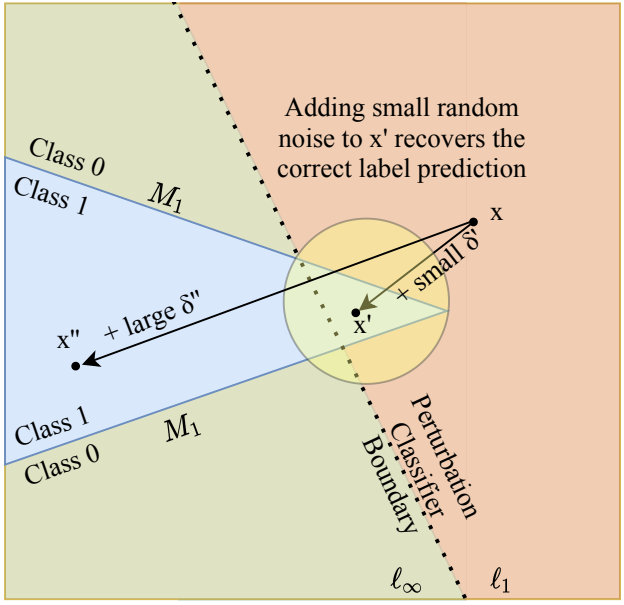

Supplement: supplementary_material [file attachment]

# Two Stage Classifier

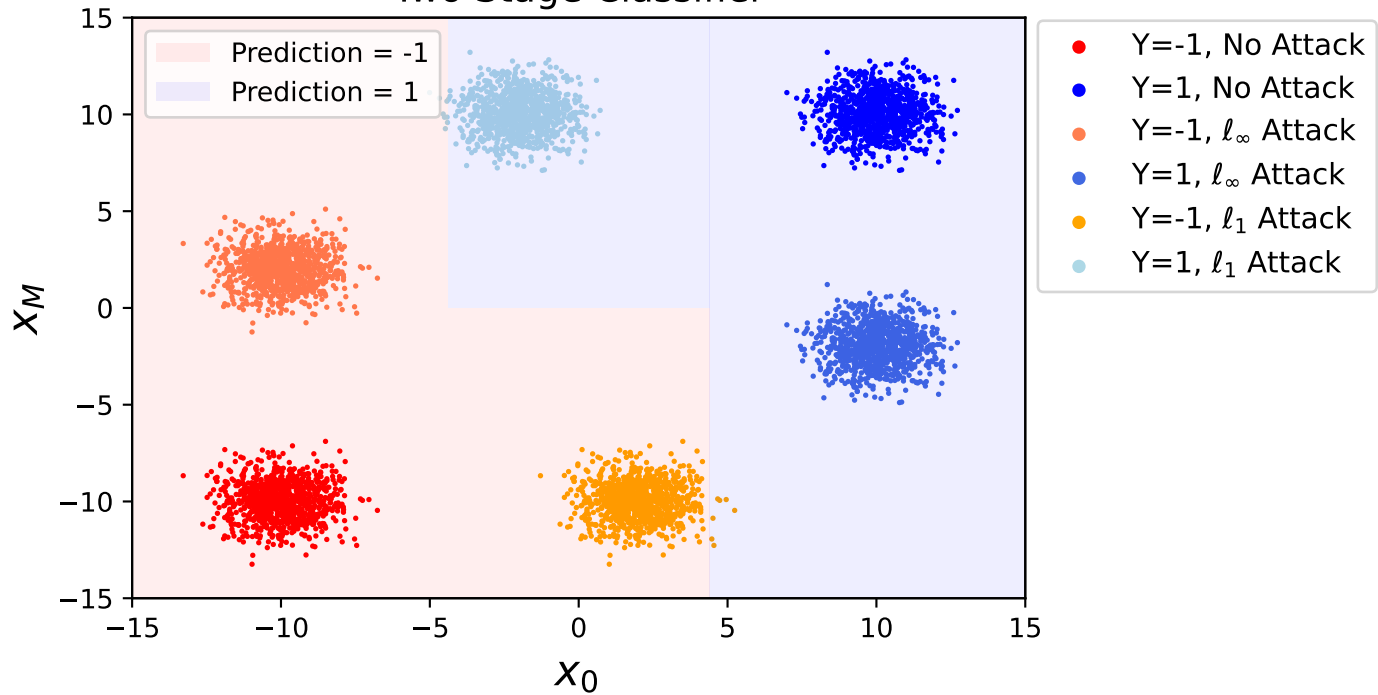

Supplement: supplementary_material [file attachment]

Second Component

20  
10  
0  
-10

-10

0

10

20

30

40

First Component

Attack Type

$\ell_\infty$

$\ell_1$

$\ell_2$

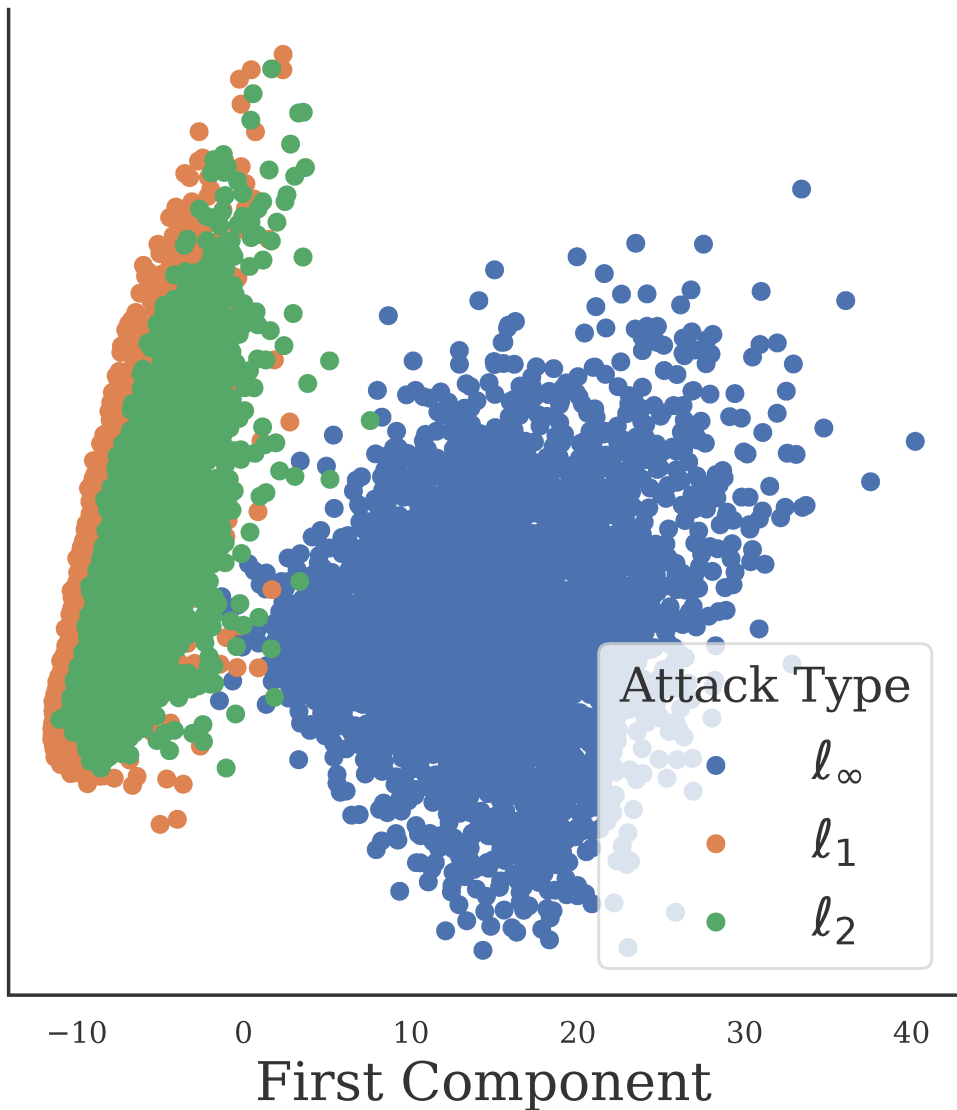

Supplement: supplementary_material [file attachment]

$\ell_\infty$  Robust Model

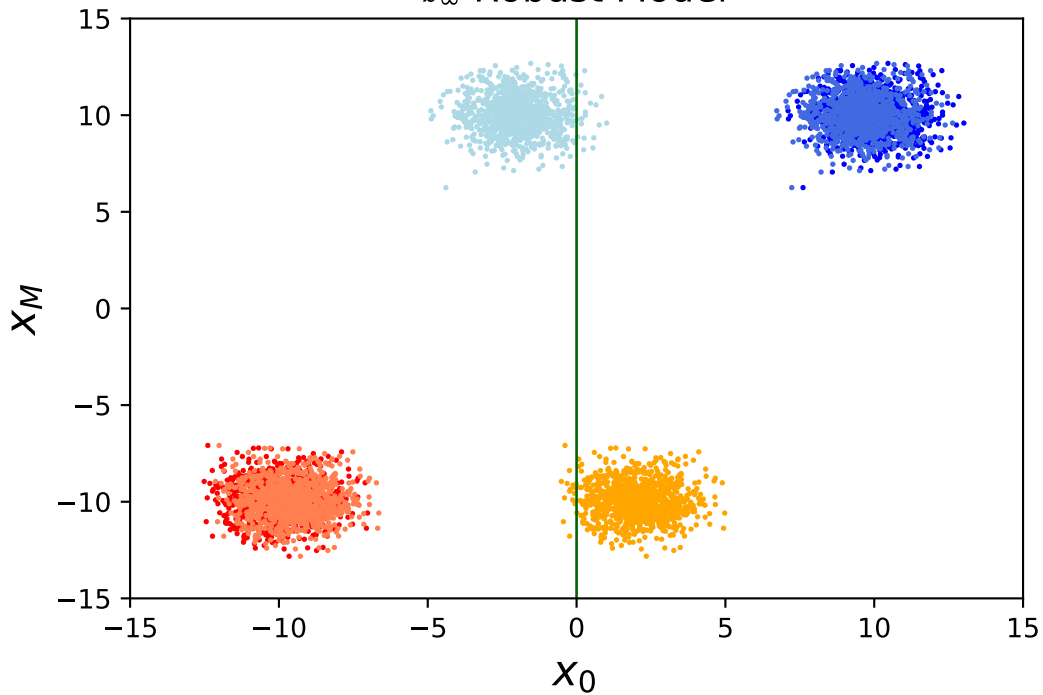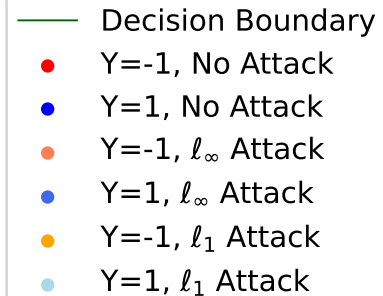

Supplement: supplementary_material [file attachment]
